# Supplementary material for: Red Blood Cell Membrane Fatty Acid Composition, Dietary Fatty Acid Intake and Diet Quality as Predictors of Inflammation in a Group of Australian Adults
Source: MDPI journal article supplement (doi:10.3390/nu15102405), 2023-05-21
Supplement: s1 [file s1]

**Supplementary Table S1.** Adjusted and unadjusted mixed-effects models showing the relationship between red blood cell and dietary fatty acids and inflammatory markers.

|                                                      | Unadjusted                  |                   | Simple Adjustment <sup>(a)</sup> |                   | Multiple Adjustments <sup>(b)</sup> |             |
|------------------------------------------------------|-----------------------------|-------------------|----------------------------------|-------------------|-------------------------------------|-------------|
|                                                      | $\beta$ (95% CI)            | p-value           | $\beta$ (95% CI)                 | p-value           | $\beta$ (95% CI)                    | p-value     |
| <b>IL-6 &amp; Fatty Acids</b>                        |                             |                   |                                  |                   |                                     |             |
| RBC - SFA                                            | 0.25 (-0.09, 0.60)          | 0.15              | 0.19 (-0.16, 0.54)               | 0.29              | -0.08 (-0.47, 0.31)                 | 0.68        |
| RBC - MUFA                                           | -0.07 (-0.44, 0.29)         | 0.70              | -0.05 (-0.42, 0.31)              | 0.78              | 0.36 (-0.05, 0.78)                  | 0.08        |
| RBC - n-6 PUFA                                       | -0.20 (-0.47, 0.07)         | 0.15              | -0.19 (-0.46, 0.08)              | 0.17              | -0.08 (-0.36, 0.20)                 | 0.59        |
| RBC - n-3 PUFA                                       | 0.13 (-0.22, 0.48)          | 0.46              | 0.17 (-0.18, 0.52)               | 0.33              | -0.05 (-0.41, 0.30)                 | 0.77        |
| RBC - n-3 Index                                      | 0.06 (-0.34, 0.45)          | 0.76              | 0.11 (-0.28, 0.50)               | 0.59              | -0.13 (-0.51, 0.25)                 | 0.50        |
| Dietary Saturated Fat intake                         | 0.03 (-0.01, 0.07)          | 0.11              | 0.03 (-0.01, 0.07)               | 0.15              | 0.03 (-0.02, 0.07)                  | 0.22        |
| Dietary monounsaturated fat intake                   | 0.00 (-0.04, 0.05)          | 0.88              | 0.00 (-0.05, 0.04)               | 0.89              | 0.01 (-0.03, 0.06)                  | 0.59        |
| Dietary polyunsaturated fat intake                   | -0.03 (-0.17, 0.11)         | 0.67              | -0.05 (-0.19, 0.08)              | 0.46              | 0.01 (-0.14, 0.16)                  | 0.91        |
| Dietary n-3 intake                                   | 0.00 (-0.003, 0.002)        | 0.55              | 0.00 (-0.003, 0.002)             | 0.62              | 0.00 (-0.003, 0.002)                | 0.66        |
| <b>TNF-<math>\alpha</math> &amp; RBC Fatty Acids</b> |                             |                   |                                  |                   |                                     |             |
| RBC - SFA                                            | 0.02 (-0.02, 0.05)          | 0.44              | 0.00 (-0.04, 0.04)               | 0.93              | 0.00 (-0.05, 0.04)                  | 0.85        |
| RBC - MUFA                                           | 0.01 (-0.05, 0.06)          | 0.81              | 0.02 (-0.04, 0.07)               | 0.54              | 0.03 (-0.04, 0.09)                  | 0.39        |
| RBC - n-6 PUFA                                       | -0.01 (-0.05, 0.03)         | 0.51              | -0.01 (-0.05, 0.03)              | 0.71              | 0.00 (-0.04, 0.04)                  | 0.95        |
| RBC - n-3 PUFA                                       | -0.02 (-0.07, 0.04)         | 0.61              | -0.01 (-0.07, 0.05)              | 0.79              | -0.02 (-0.09, 0.04)                 | 0.50        |
| RBC - n-3 Index                                      | -0.02 (-0.09, 0.04)         | 0.46              | -0.01 (-0.09, 0.05)              | 0.66              | -0.03 (-0.10, 0.04)                 | 0.44        |
| Dietary Saturated Fat intake                         | <b>0.01 (0.001, 0.01)</b>   | <b>0.02</b>       | <b>0.01 (0.001, 0.01)</b>        | <b>0.03</b>       | <b>0.001 (0.001, 0.01)</b>          | <b>0.02</b> |
| Dietary monounsaturated fat intake                   | 0.00 (-0.002, 0.01)         | 0.21              | 0.00 (-0.003, 0.01)              | 0.30              | 0.00 (-0.003, 0.01)                 | 0.28        |
| Dietary polyunsaturated fat intake                   | 0.00 (-0.01, 0.02)          | 0.63              | 0.00 (-0.01, 0.02)               | 0.78              | 0.01 (-0.01, 0.02)                  | 0.55        |
| Dietary n3 intake                                    | 0.00 (-0.0004, 0.0002)      | 0.46              | 0.00 (-0.0004, 0.0002)           | 0.48              | 0.00 (-0.001, 0.0002)               | 0.20        |
| <b>CRP &amp; RBC Fatty Acids</b>                     |                             |                   |                                  |                   |                                     |             |
| RBC - SFA                                            | <b>0.55 (0.06, 1.05)</b>    | <b>0.03</b>       | <b>0.51 (0.01, 1.02)</b>         | <b>0.047</b>      | 0.30 (-0.27, 0.88)                  | 0.30        |
| RBC - MUFA                                           | <b>-0.88 (-1.37, -0.39)</b> | <b>&lt;0.001*</b> | <b>-0.87 (-1.37, -0.38)</b>      | <b>&lt;0.001*</b> | -0.59 (-1.26, 0.09)                 | 0.09        |
| RBC - n-6 PUFA                                       | -0.07 (-0.48, 0.34)         | 0.73              | -0.06 (-0.47, 0.35)              | 0.77              | -0.07 (-0.54, 0.41)                 | 0.79        |
| RBC - n-3 PUFA                                       | 0.34 (-0.18, 0.86)          | 0.20              | 0.38 (-0.15, 0.90)               | 0.16              | 0.21 (-0.41, 0.83)                  | 0.51        |
| RBC - n-3 Index                                      | 0.46 (-0.12, 1.04)          | 0.12              | 0.51 (-0.07, 1.09)               | 0.08              | 0.35 (-0.32, 1.02)                  | 0.31        |
| Dietary Saturated Fat intake                         | -0.02 (-0.08, 0.04)         | 0.52              | -0.02 (-0.08, 0.04)              | 0.48              | -0.02 (-0.09, 0.05)                 | 0.64        |
| Dietary monounsaturated fat intake                   | -0.04 (-0.11, 0.02)         | 0.18              | -0.05 (-0.11, 0.01)              | 0.13              | -0.02 (-0.10, 0.05)                 | 0.52        |

|                                    |                             |             |                             |             |                       |      |
|------------------------------------|-----------------------------|-------------|-----------------------------|-------------|-----------------------|------|
| Dietary polyunsaturated fat intake | <b>-0.21 (-0.40, -0.01)</b> | <b>0.04</b> | <b>-0.23 (-0.42, -0.03)</b> | <b>0.02</b> | -0.12 (-0.35, 0.12)   | 0.33 |
| Dietary n-3 Intake                 | -0.003 (-0.01, 0.001)       | 0.09        | -0.003 (-0.01, 0.001)       | 0.10        | -0.003 (-0.01, 0.001) | 0.15 |

Data is presented for mixed effects models with beta-coefficients, 95% CI and p-values. Findings with  $p < 0.05$  are considered statistically significant and bolded.

(a) adjusted for time only

(b) adjusted for age, BMI, sex, time, intake of anti-inflammatory supplements, inflammatory conditions and smoking status

\* Remained significant when adjusting for multiple testing using Bonferroni correction.

CRP, C-reactive protein; IL-6, interleukin 6; MUFA, monounsaturated fatty acids; n-3, omega-3; PUFA, polyunsaturated fatty acids; RBC, red blood cell; SFA, saturated fatty acids; TNF- $\alpha$ , tumour necrosis factor  $\alpha$ .

**Supplementary Table S2:** Adjusted and unadjusted mixed-effects models showing the relationship between individual red blood cell membrane fatty acids and inflammatory markers.

|                               | Unadjusted       |              | Adjusted <sup>(a)</sup> |             | Adjusted <sup>(b)</sup> |             |
|-------------------------------|------------------|--------------|-------------------------|-------------|-------------------------|-------------|
|                               | $\beta$ (95% CI) | p-value      | $\beta$ (95% CI)        | p-value     | $\beta$ (95% CI)        | p-value     |
| <b>IL-6 &amp; Fatty Acids</b> |                  |              |                         |             |                         |             |
| C14:0                         | .18              | 0.81         | .04                     | 0.95        | -.75                    | 0.33        |
| C16:0                         | .32              | 0.24         | .19                     | 0.50        | -.10                    | 0.71        |
| C18:0                         | .42              | 0.14         | .34                     | 0.24        | -.17                    | 0.59        |
| C18:1n-9                      | -.17             | 0.48         | -.19                    | 0.42        | -.02                    | 0.93        |
| C18:1n-7                      | .68              | 0.39         | .83                     | 0.29        | <b>1.61</b>             | <b>0.04</b> |
| C18:2n-6                      | -.20             | 0.35         | -.20                    | 0.34        | .14                     | 0.50        |
| C20:0                         | -1.53            | 0.30         | -1.47                   | 0.32        | -1.22                   | 0.39        |
| C20:1n-9                      | -1.46            | 0.58         | -1.91                   | 0.46        | -1.23                   | 0.63        |
| C20:2n-6                      | -1.65            | 0.49         | -1.62                   | 0.49        | -.85                    | 0.71        |
| C20:3n-6                      | .35              | 0.27         | .43                     | 0.16        | <b>.63</b>              | <b>0.04</b> |
| C20:4n-6                      | -.13             | 0.44         | -.15                    | 0.38        | -.25                    | 0.15        |
| C20:5n-3                      | .27              | 0.59         | .50                     | 0.32        | .05                     | 0.91        |
| C22:0                         | -.16             | 0.83         | .10                     | 0.89        | .66                     | 0.39        |
| C22:4n-6                      | <b>-.86</b>      | <b>0.048</b> | <b>-.90</b>             | <b>0.04</b> | <b>-.89</b>             | <b>0.04</b> |

|                                                      |              |              |              |              |              |             |
|------------------------------------------------------|--------------|--------------|--------------|--------------|--------------|-------------|
| C22:5n-3                                             | .75          | 0.17         | .77          | 0.15         | .45          | 0.42        |
| C22:6n-3                                             | .03          | 0.89         | .07          | 0.78         | -.14         | 0.56        |
| C24:0                                                | -.09         | 0.80         | 0.00         | 0.99         | .25          | 0.48        |
| C24:1n-9                                             | -.01         | 0.99         | 0.06         | 0.85         | .42          | 0.18        |
| <b>TNF-<math>\alpha</math> &amp; RBC Fatty Acids</b> |              |              |              |              |              |             |
| C14:0                                                | -.01         | 0.88         | -.05         | 0.55         | -.06         | 0.46        |
| C16:0                                                | .01          | 0.75         | -.02         | 0.53         | -.02         | 0.57        |
| C18:0                                                | .05          | 0.12         | .03          | 0.38         | -.01         | 0.87        |
| C18:1n-9                                             | .02          | 0.56         | .02          | 0.57         | .00          | 0.95        |
| C18:1n-7 (Vaccenate)                                 | .00          | 0.96         | .03          | 0.76         | .10          | 0.24        |
| C18:2n-6                                             | -.03         | 0.38         | -.03         | 0.45         | -.02         | 0.52        |
| C20:0                                                | -.07         | 0.64         | -.05         | 0.74         | -.05         | 0.76        |
| C20:1n-9                                             | .25          | 0.32         | .19          | 0.44         | .19          | 0.43        |
| C20:2n-6                                             | .20          | 0.38         | .21          | 0.34         | .22          | 0.30        |
| C20:3n-6                                             | -.01         | 0.89         | .00          | 0.97         | .05          | 0.21        |
| C20:4n-6                                             | .00          | 0.86         | .01          | 0.77         | .00          | 0.85        |
| C20:5n-3                                             | -.12         | 0.08         | -.08         | 0.23         | -.10         | 0.17        |
| C22:0                                                | -.10         | 0.18         | -.08         | 0.33         | -.04         | 0.61        |
| C22:4n-6                                             | -.11         | 0.12         | -.11         | 0.11         | -.10         | 0.18        |
| C22:5n-3                                             | .03          | 0.69         | .02          | 0.72         | .01          | 0.92        |
| C22:6n-3                                             | .01          | 0.88         | .01          | 0.77         | .00          | 0.94        |
| C24:0                                                | .01          | 0.79         | .03          | 0.50         | .05          | 0.24        |
| C24:1n-9                                             | -.02         | 0.67         | .00          | 0.95         | .03          | 0.47        |
| <b>CRP &amp; RBC Fatty Acids</b>                     |              |              |              |              |              |             |
| C14:0                                                | .48          | 0.66         | .41          | 0.71         | -.07         | 0.95        |
| C16:0                                                | <b>1.27</b>  | <b>0.001</b> | <b>1.19</b>  | <b>0.002</b> | <b>.98</b>   | <b>0.02</b> |
| C18:0                                                | .60          | 0.14         | .55          | 0.19         | -.07         | 0.89        |
| C18:1n-9                                             | -.42         | 0.23         | -.44         | 0.22         | -.11         | 0.79        |
| C18:1n-7                                             | <b>-3.65</b> | <b>0.001</b> | <b>-3.53</b> | <b>0.001</b> | <b>-2.56</b> | <b>0.02</b> |

---

|          |              |             |              |             |       |      |
|----------|--------------|-------------|--------------|-------------|-------|------|
| C18:2n-6 | <b>-.80</b>  | <b>0.01</b> | <b>-.79</b>  | <b>0.01</b> | -.65  | 0.06 |
| C20:0    | -1.05        | 0.62        | -1.14        | 0.59        | -1.22 | 0.56 |
| C20:1n-9 | -2.25        | 0.55        | -2.58        | 0.49        | -1.73 | 0.63 |
| C20:2n-6 | -2.74        | 0.43        | -2.63        | 0.44        | -1.46 | 0.65 |
| C20:3n-6 | <b>-.94</b>  | <b>0.04</b> | -.85         | 0.06        | -.64  | 0.20 |
| C20:4n-6 | <b>.61</b>   | <b>0.01</b> | <b>.59</b>   | <b>0.02</b> | .41   | 0.13 |
| C20:5n-3 | .79          | 0.29        | 1.06         | 0.16        | 1.11  | 0.18 |
| C22:0    | -1.36        | 0.20        | -1.04        | 0.34        | -.49  | 0.67 |
| C22:4n-6 | .52          | 0.45        | .47          | 0.49        | .55   | 0.46 |
| C22:5n-3 | -.31         | 0.70        | -.34         | 0.68        | -.77  | 0.39 |
| C22:6n-3 | .57          | 0.13        | .61          | 0.10        | .36   | 0.37 |
| C24:0    | -.39         | 0.42        | -.35         | 0.48        | -.08  | 0.88 |
| C24:1n-9 | <b>-1.03</b> | <b>0.02</b> | <b>-1.01</b> | <b>0.02</b> | -.55  | 0.26 |

Data is presented for mixed effects models with beta-coefficients, 95% CI and p-values. Findings with  $p < 0.05$  are considered statistically significant and bolded.

(a) adjusted for time only

(b) adjusted for age, BMI, sex, time, intake of anti-inflammatory supplements, inflammatory conditions and smoking status  
CRP, C-reactive protein; IL-6, interleukin 6; RBC, red blood cell; TNF- $\alpha$ , tumour necrosis factor  $\alpha$ .
